# Supplementary material for: A simple tandem mass spectrometry method for structural identification of pentose oligosaccharides
Source: Royal Society of Chemistry journal article supplement (doi:10.1039/d3an00068k), 2023-01-01
Supplement: d3an00068k1.pdf [file d3an00068k1.pdf]

Supplementary Information

## **A simple tandem mass spectrometry method for structural identification of pentose oligosaccharide**

Shang-Ting Tsai<sup>1,2</sup>, Hsu-Chen Hsu<sup>1</sup>, and Chi-Kung Ni<sup>\*1,3</sup>

<sup>1</sup> Institute of Atomic and Molecular Sciences, Academia Sinica, P. O. Box 23-166, Taipei  
10617, Taiwan

<sup>2</sup> Current address: Department of Applied Chemistry, National Chiayi University, Chiayi City  
600355, Taiwan

<sup>3</sup> Department of Chemistry, National Tsing Hua University, Hsinchu 30013, Taiwan.

\*Email address: ckni@po.iams.sinica.edu.tw

### (A) Relative abundances measured by NMR spectroscopy

**Table S1.** Relative abundances (in %) of pentose isomers in D<sub>2</sub>O measured by NMR spectroscopy.<sup>53</sup>

| Carbohydrate            | Temp (°C) | α-Pyranose (%) | β-Pyranose (%) | α-Furanose (%) | β-Furanose (%) | Acyclic carbonyl form(%) |
|-------------------------|-----------|----------------|----------------|----------------|----------------|--------------------------|
| Arabinose <sup>42</sup> | 31        | 60             | 35.5           | 2.5            | 2              | 0.03                     |
| Xylose <sup>42</sup>    | 31        | 36.5           | 63             | <1             | <1             | 0.02                     |

### (B) Branching ratio of cross-ring dissociation and dehydration at the reducing end

For the disaccharides or oligosaccharides with 1→4 or 1→5 linkage at the reducing end, the cross-ring dissociation mechanism predicts the loss of neutral  $m=62$  if the O1 atom of the sugar at the reducing end is <sup>18</sup>O labelled. Figure S1 shows that the cross-ring fragments are dominated by the loss of neutral  $m=62$ . In addition to the cross-ring dissociation, dissociation mechanism predicts that dehydration mainly occurs by transferring an H atom to O1 of the sugar at the reducing end, followed by breaking the C1-O1 bond. Figure S1 shows that the dehydration products mainly result from the loss of neutral  $m=20$ , consisting to the mechanism. The branching ratios,  $B$ , of fragment ions from the loss of <sup>18</sup>O labelled neutrals are calculated using the following equation.

$$B = \frac{\text{Fragment ions from labeled neutral loss}}{\text{Fragment ions from labeled and unlabeled neutral losses}}$$

For example, the branching ratio of dehydration reaction of lithiated <sup>18</sup>O labeled β-Xylp-(1→4)-Xylp is:

$$\frac{I_{(m/z\ 271)}}{(I_{(m/z\ 271)} + I_{(m/z\ 273)})}$$

The branching ratios of fragment ions from the loss of <sup>18</sup>O labelled neutrals, as listed in Table 2, suggests dissociation follows the proposed mechanism closely.

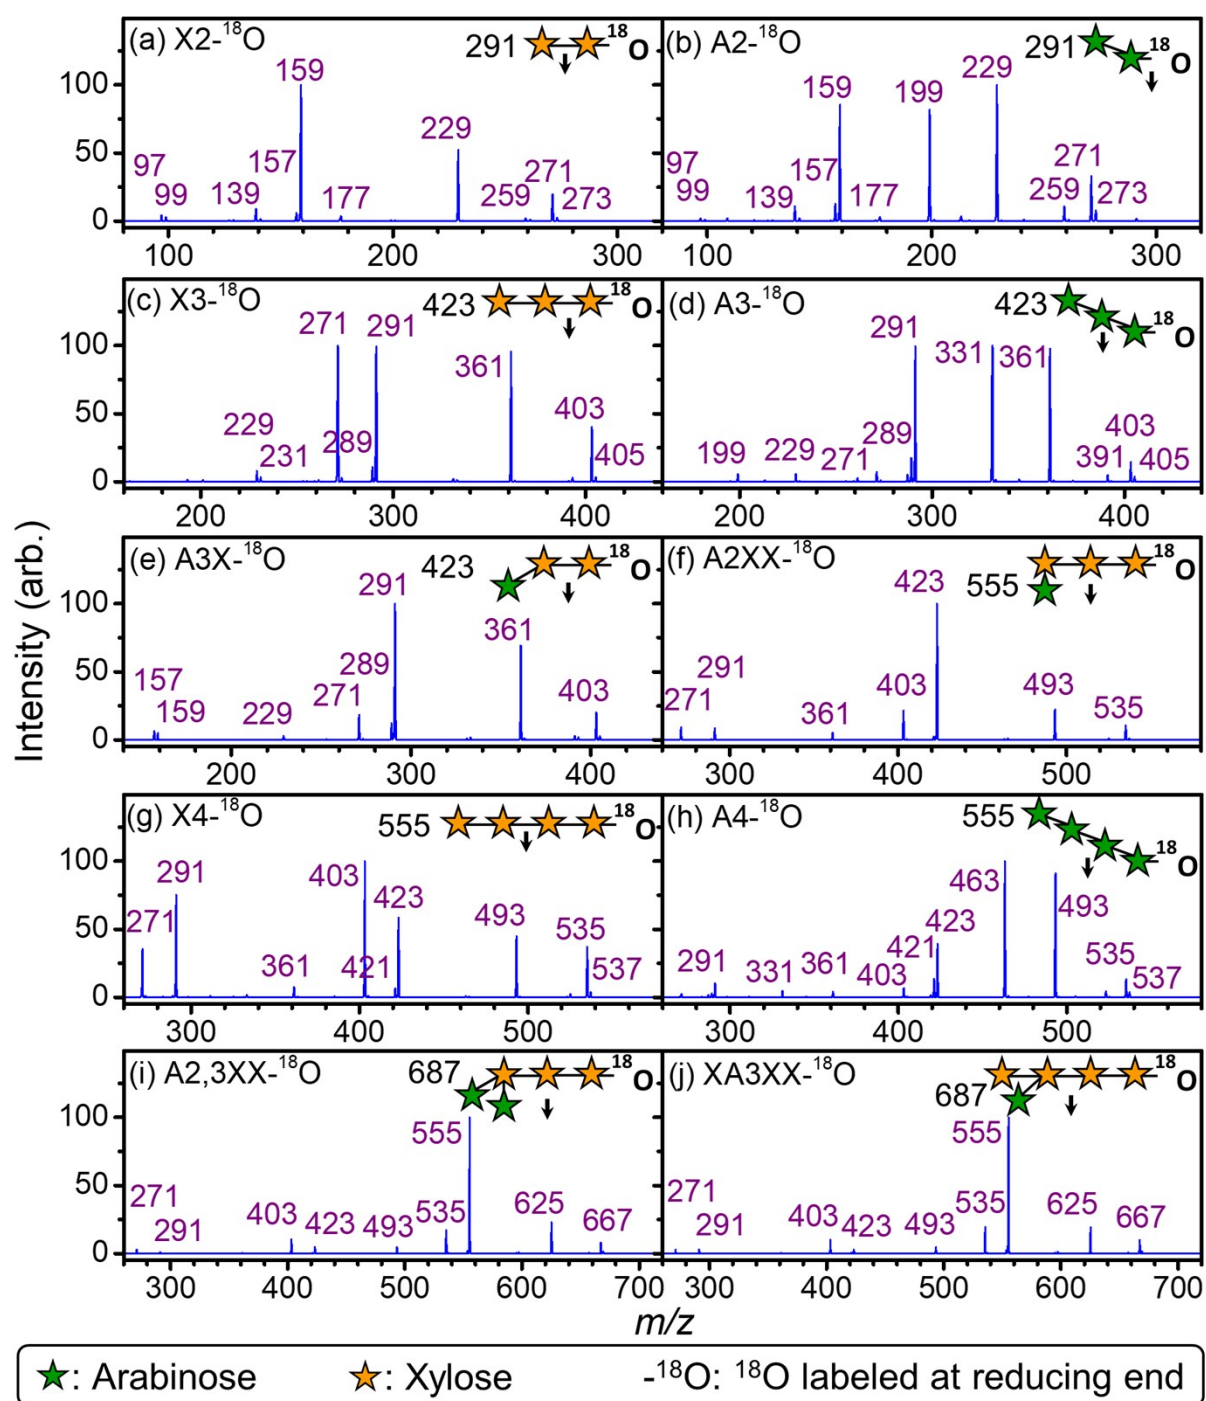

**Figure S1.** CID spectra of  $^{18}\text{O}$  labeled (at O1 of the sugar at the reducing end) of pentose disaccharide and oligosaccharides. (a): X2 ( $\beta$ -Xylp-(1 $\rightarrow$ 4)-Xylp); (b) A2 ( $\alpha$ -Araf-(1 $\rightarrow$ 5)-Araf); (c): X3 ( $\beta$ -Xylp-(1 $\rightarrow$ 4)- $\beta$ -Xylp-(1 $\rightarrow$ 4)-Xylp); (d): A3 ( $\alpha$ -Araf-(1 $\rightarrow$ 5)- $\alpha$ -Araf-(1 $\rightarrow$ 5)-Araf); (e): A3X ( $\alpha$ -Araf-(1 $\rightarrow$ 3)- $\beta$ -Xylp-(1 $\rightarrow$ 4)-Xylp); (f): A2XX ( $\alpha$ -Araf-(1 $\rightarrow$ 2)- $\beta$ -Xylp-(1 $\rightarrow$ 4)- $\beta$ -Xylp-(1 $\rightarrow$ 4)-Xylp); (g): X4 ( $\beta$ -Xylp-(1 $\rightarrow$ 4)- $\beta$ -Xylp-(1 $\rightarrow$ 4)- $\beta$ -Xylp-(1 $\rightarrow$ 4)-Xylp); (h): A4 ( $\alpha$ -Araf-(1 $\rightarrow$ 5)- $\alpha$ -Araf-(1 $\rightarrow$ 5)- $\alpha$ -Araf-(1 $\rightarrow$ 5)-Araf); (i): A2,3XX ( $\alpha$ -Araf-(1 $\rightarrow$ 2)-[ $\alpha$ -

Araf-(1→3)]-β-Xylp-(1→4)-β-Xylp-(1→4)-Xylp); (j): XA3XX (β-Xylp-(1→4)-[α-Araf-(1→3)]-β-Xylp-(1→4)-β-Xylp-(1→4)-Xylp).

| AOX   | Linkage at Reducing end | Dehydration                                                   | Cross ring                                                    | Cross ring                                                    |
|-------|-------------------------|---------------------------------------------------------------|---------------------------------------------------------------|---------------------------------------------------------------|
|       |                         | $\frac{I_{(20u\ loss)}}{(I_{(20u\ loss)} + I_{(18u\ loss)})}$ | $\frac{I_{(62u\ loss)}}{(I_{(62u\ loss)} + I_{(60u\ loss)})}$ | $\frac{I_{(92u\ loss)}}{(I_{(92u\ loss)} + I_{(90u\ loss)})}$ |
| X2    | 1→4                     | 90%                                                           | 99%                                                           |                                                               |
| A2    | 1→5                     | 80%                                                           | 99%                                                           | 99%                                                           |
| X3    | 1→4                     | 92%                                                           | 99%                                                           |                                                               |
| A3    | 1→5                     | 79%                                                           | 99%                                                           | 99%                                                           |
| A3X   | 1→4                     | 88%                                                           | 98%                                                           |                                                               |
| A2XX  | 1→4                     | 91%                                                           | 99%                                                           |                                                               |
| X4    | 1→4                     | 90%                                                           | 99%                                                           |                                                               |
| A4    | 1→5                     | 78%                                                           | 100%                                                          | 99%                                                           |
| A23XX | 1→4                     | 84%                                                           | 99%                                                           |                                                               |
| XA3XX | 1→4                     | 86%                                                           | 99%                                                           |                                                               |

**Table 2.** Branching ratios of fragment ions from the loss of <sup>18</sup>O labelled neutrals. The precursor ions are the lithiated disaccharides and oligosaccharides displayed in Figure S1.

### (C) Additional examples

The application to determine the structures of xylose in β-Xylp-(1→4)-β-Xylp-(1→4)-Xyl, α-Araf-(1→4)-β-Xylp-(1→4)-Xyl, and α-Xylp-(1→4)-Glc are illustrated in Figure S2, and the spectral similarity scores are shown Table S3. All the monosaccharides can be predicted correctly.

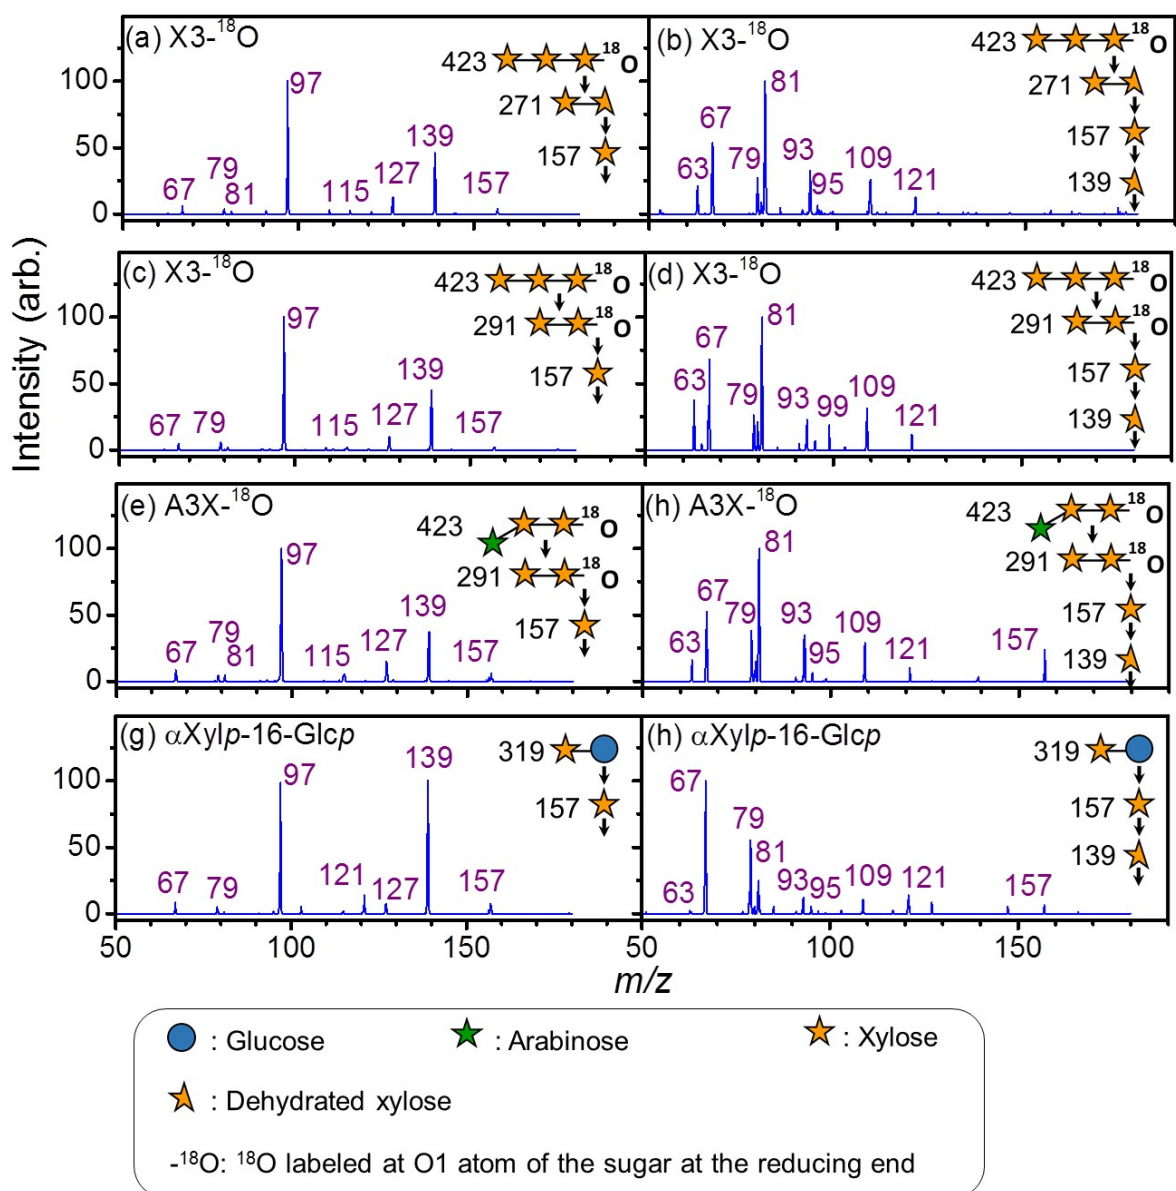

**Figure S2.** CID spectra of lithiated <sup>18</sup>O-labeled X3 ( $\beta$ -Xylp-(1 $\rightarrow$ 4)- $\beta$ -Xylp-(1 $\rightarrow$ 4)-Xylp-<sup>18</sup>O) (a)-(d), <sup>18</sup>O-labeled A<sup>3</sup>X ( $\alpha$ -Araf-(1 $\rightarrow$ 3)- $\beta$ -Xylp-(1 $\rightarrow$ 4)-Xylp-<sup>18</sup>O) (e) and (f), and  $\alpha$ -Xylp-(1 $\rightarrow$ 6)-Glc p (g) and (h).

| Fig.         | $\alpha$ Arap | $\beta$ Arap | $\alpha$ Araf | $\beta$ Araf | $\beta$ Xylf | $\alpha$ Xylf | $\beta$ Xylp | $\alpha$ Xylp |
|--------------|---------------|--------------|---------------|--------------|--------------|---------------|--------------|---------------|
| S2(a)/S2 (b) | 77/83         | 53/57        | 84/83         | 71/88        | 76/83        | 63/61         | <b>99/98</b> | 79/59         |
| S2(c)/S2(d)  | 74/82         | 54/59        | 81/82         | 69/87        | 74/82        | 64/62         | <b>98/98</b> | 79/60         |
| S2(e)/S2(f)  | 73/83         | 50/59        | 80/84         | 67/87        | 72/84        | 59/61         | <b>95/97</b> | 75/60         |
| S2(g)/S2(h)  | 90/41         | 72/87        | 85/44         | 86/45        | 91/42        | 82/89         | 82/58        | <b>97/98</b>  |

**Table S3.** The spectral similarity scores  $R$  of spectra of  $m/z$  157 and  $m/z$  139 shown in Figure S2. The number before and after slash denote the scores  $R$  of spectra of  $m/z$  157 and 139 shown in Figure S2, respectively. The correct assignments are highlighted in red.

The applications to determine the structures of arabinose in  $\alpha$ -Araf in  $\alpha$ -Araf-(1 $\rightarrow$ 5)-Araf,  $\alpha$ -Araf-(1 $\rightarrow$ 5)- $\alpha$ -Araf-(1 $\rightarrow$ 5)-Araf, and  $\alpha$ -Araf-(1 $\rightarrow$ 3)- $\beta$ -Xylp-(1 $\rightarrow$ 4)-Xylp are shown in Figure S3, and the spectral similarity scores are shown in Table S3. The similarity scores show  $\alpha$ -Arap and  $\beta$ -Xylf are near that of  $\alpha$ -Araf, indicating they are not easy to be distinguished. This is consistent to the results shown in Table 1.

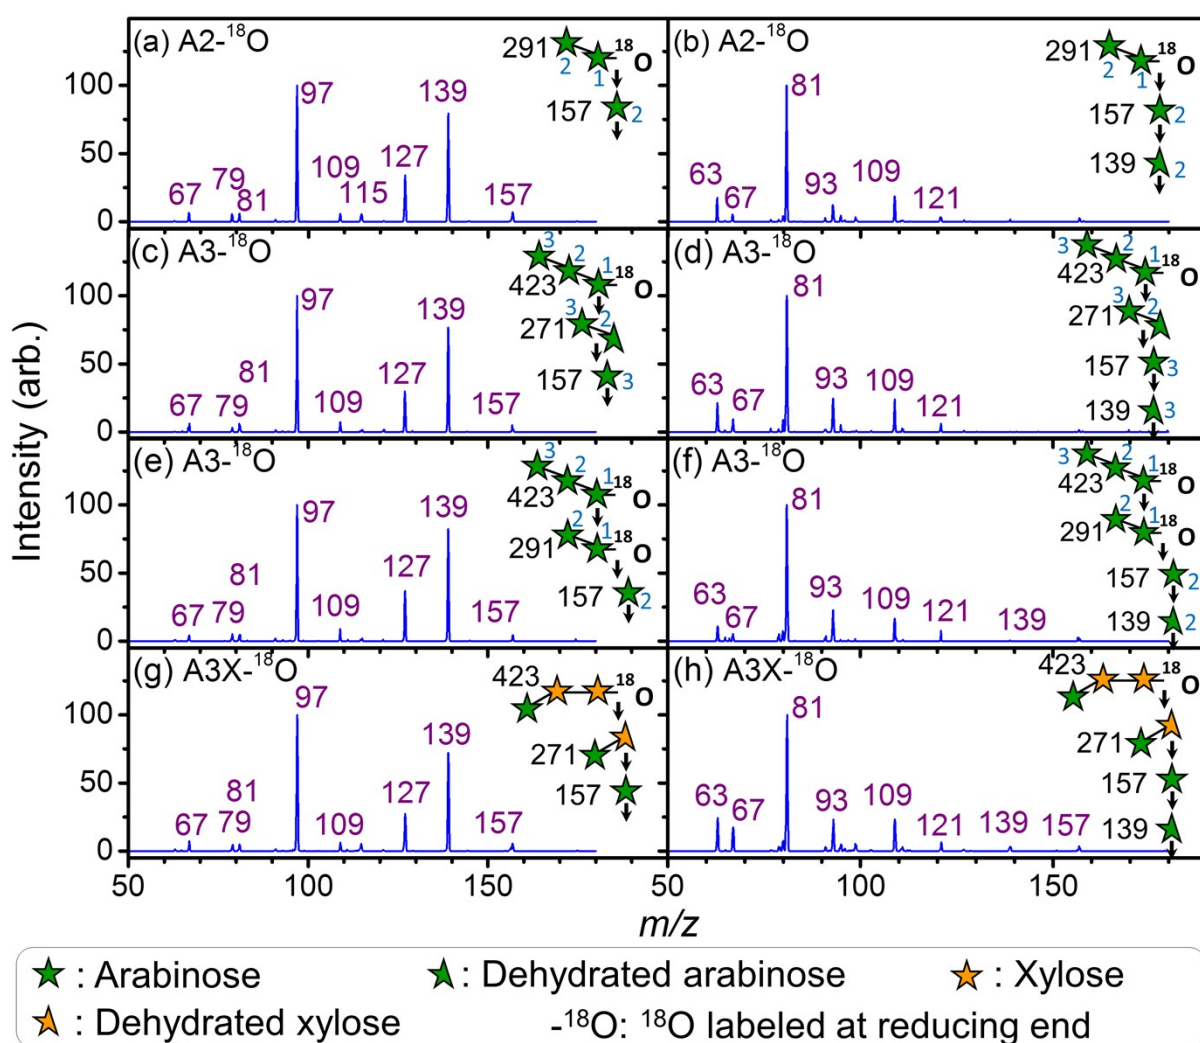

**Figure S3.** CID spectra of lithiated <sup>18</sup>O-labeled A2 ( $\alpha$ -Araf-(1 $\rightarrow$ 5)-Araf) (a), (b), <sup>18</sup>O-labeled A3 ( $\alpha$ -Araf-(1 $\rightarrow$ 5)- $\alpha$ -Araf-(1 $\rightarrow$ 5)-Araf-<sup>18</sup>O) (c)-(f), and <sup>18</sup>O-labeled A3X ( $\alpha$ -Araf-(1 $\rightarrow$ 3)- $\beta$ -Xylp-(1 $\rightarrow$ 4)-Xylp-<sup>18</sup>O) (g), (h).

| Fig.        | $\alpha$ Arap | $\beta$ Arap | $\alpha$ Araf | $\beta$ Araf | $\beta$ Xylf | $\alpha$ Xylf | $\beta$ Xylp | $\alpha$ Xylp |
|-------------|---------------|--------------|---------------|--------------|--------------|---------------|--------------|---------------|
| S3(a)/S3(b) | 97/97         | 59/41        | 96/97         | 79/92        | 95/97        | 69/45         | 79/79        | 84/43         |
| S3(c)/S3(d) | 96/99         | 59/42        | 97/98         | 79/93        | 95/98        | 69/46         | 80/81        | 84/44         |
| S3(e)/S3(f) | 95/97         | 58/43        | 95/97         | 77/91        | 94/96        | 68/46         | 79/80        | 83/44         |
| S3(g)/S3(h) | 90/97         | 57/44        | 97/95         | 77/97        | 89/97        | 67/47         | 87/85        | 82/46         |

**Table S4.** Spectral similarity scores  $R$  of CID spectra of  $m/z$  157 and  $m/z$  139 shown in Figure S3. The number before and after slash denote the scores  $R$  of spectra of  $m/z$  157 and 139 shown in Figure S3, respectively. The correct assignments are highlighted in red, and both scores higher than 90 are highlighted in green.
